# Supplementary material for: Structural elucidation and interaction profiling of a novel bismuth-based organic–inorganic hybrid: (C8H14N2)3(BiCl6)2
Source: Royal Society of Chemistry journal article supplement (doi:10.1039/d6ra01928e), 2026-04-13
Supplement: d6ra01928e1.pdf [file d6ra01928e1.pdf]

## Supplementary

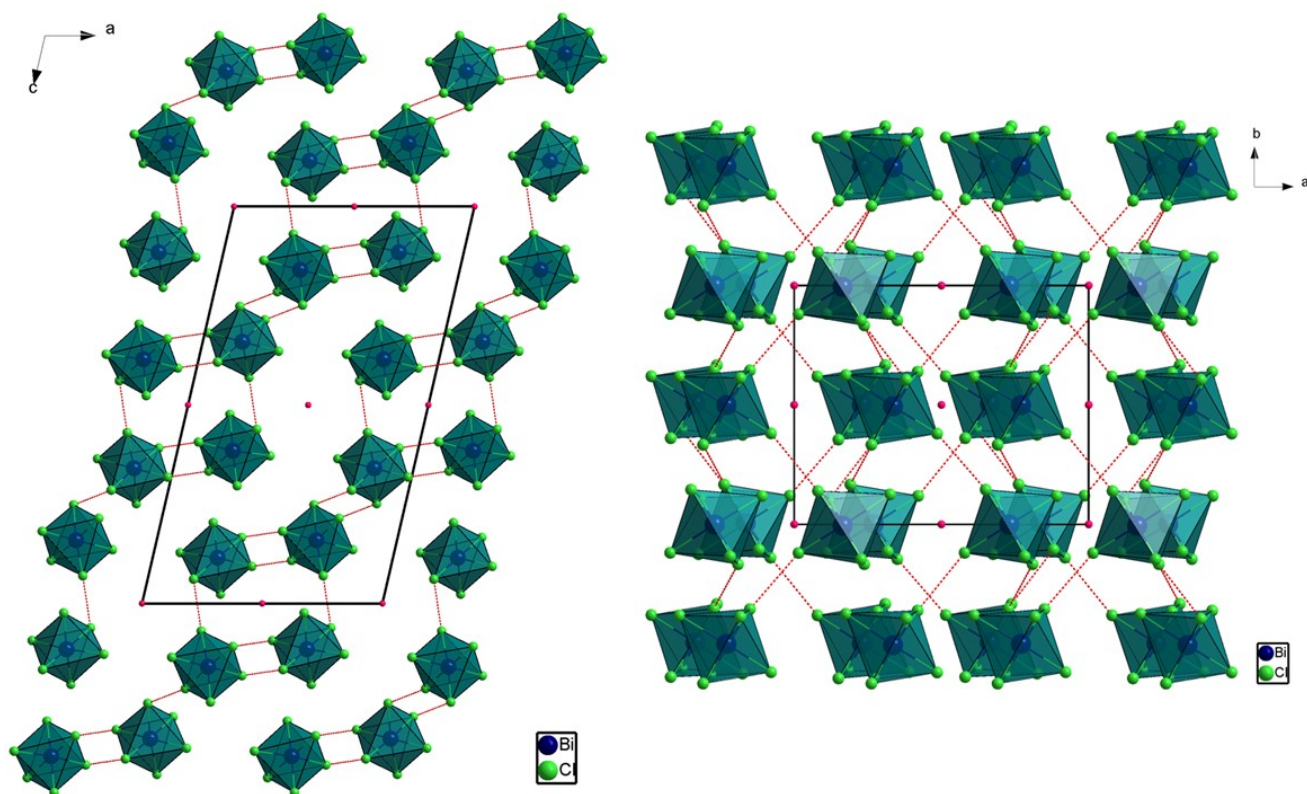

Fig. 1.S: halogen-halogen interactions arrangement

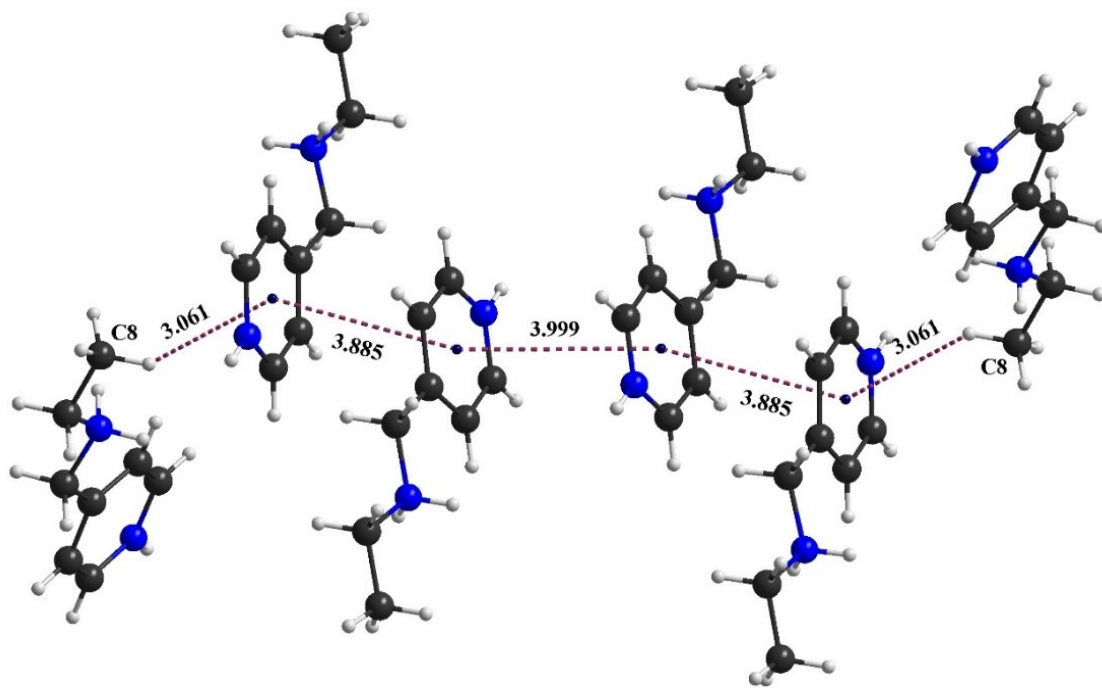

Fig. 2.S:  $\pi \dots \pi$  interactions

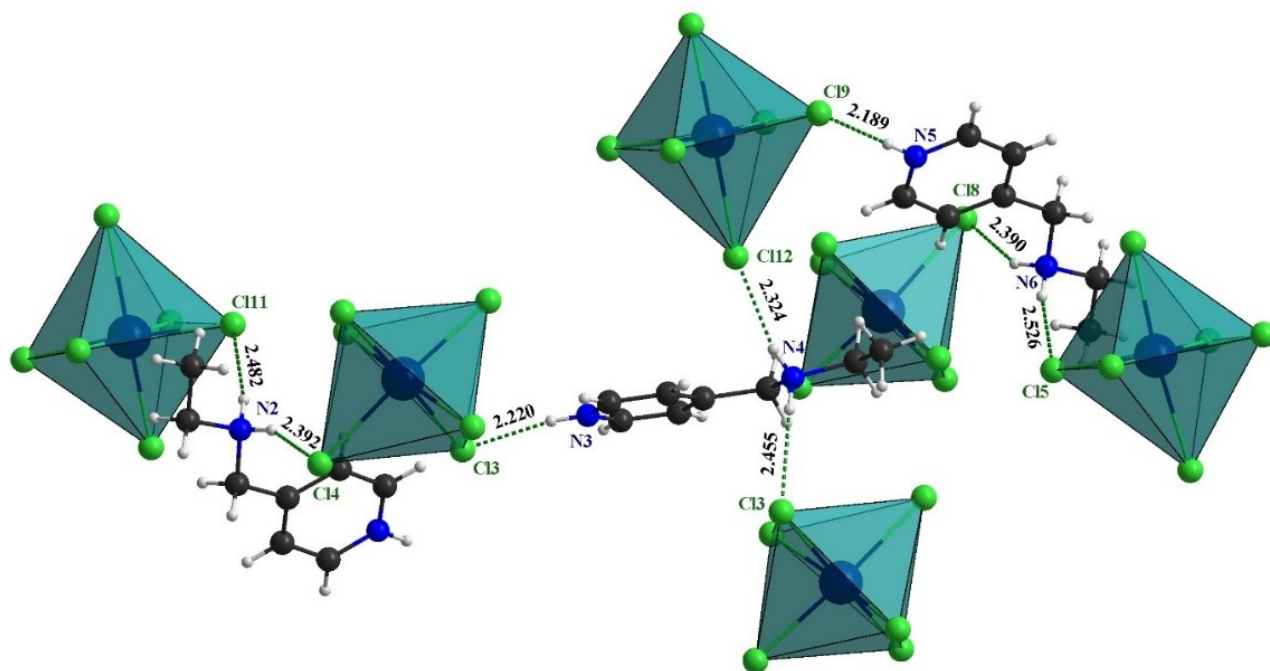

Fig. 3.S: Hydrogen bonding of the titled compound

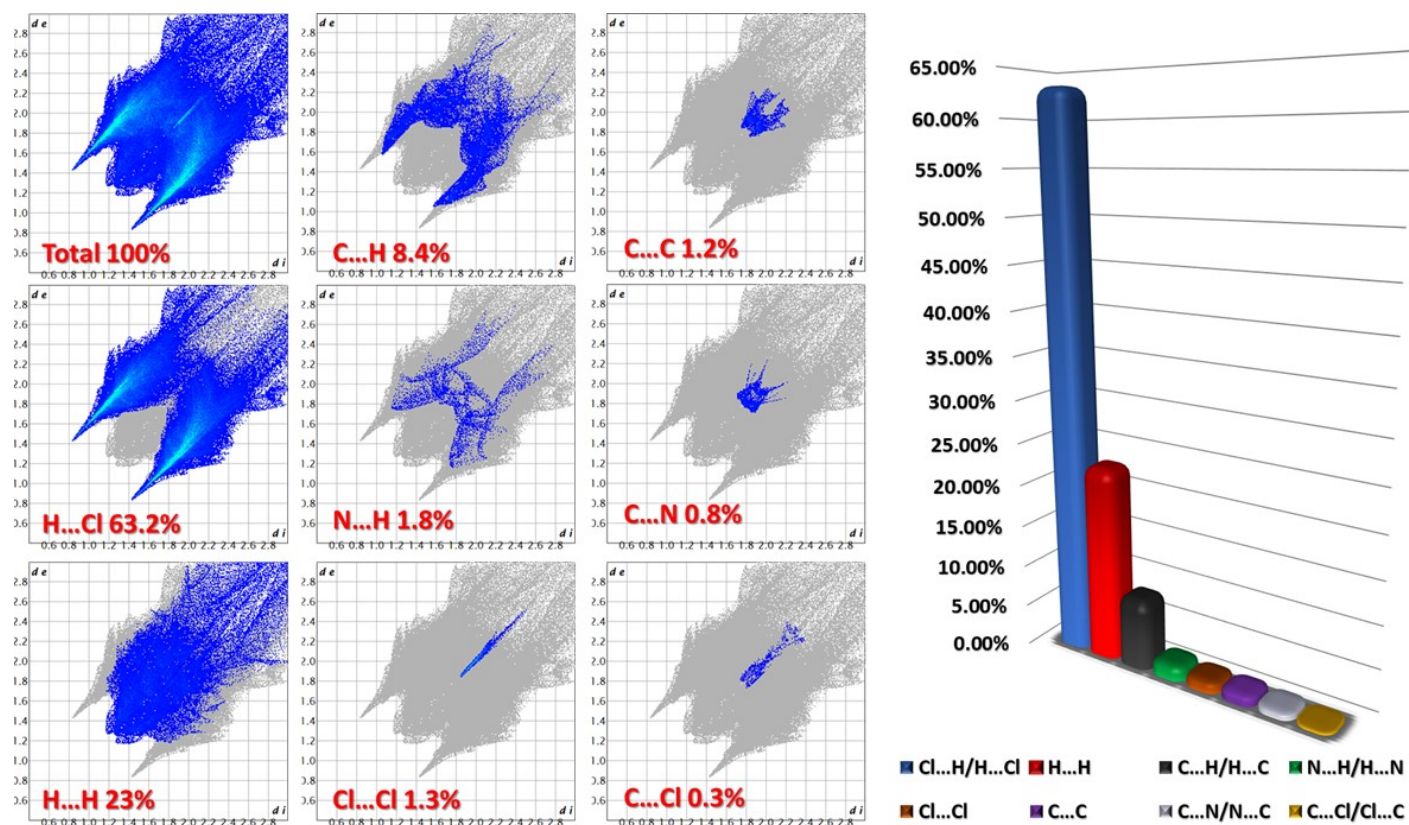

Fig. 4.S: 2D Visualization of Total Contact Contributions to the Hirshfeld Surface
